# Supplementary material
Source: bioRxiv or medRxiv preprint supplement (https://medrxiv.org/highwire/filestream/96405/field_highwire_adjunct_files/1/2020.09.09.20191593-2.pdf)

## Supplemental Table S1, Supplemental Figure S2

Running Title: COVID-19Predict – Predicting Pandemic Trends.

Jürgen Bosch<sup>1,2</sup>, Austin Wilson<sup>3</sup>, Karthik O’Neil<sup>4</sup>, Peter A. Zimmerman<sup>5,6</sup>

<sup>1</sup> Division of Pediatric Pulmonology and Allergy/Immunology, Case Western Reserve University, Cleveland, OH, United States

<sup>2</sup>InterRayBio, LLC, Baltimore, MD, United States

<sup>3</sup> Department of Computer Science, Case Western Reserve University, Cleveland, OH, United States

<sup>4</sup> Andrews Osborne Academy (AOA), Willoughby, OH, United States

<sup>5</sup> The Center for Global Health and Diseases, Pathology Department, Case Western Reserve University, Cleveland, OH, United States

<sup>6</sup> Masters of Public Health Program, Department of Population Quantitative Health Sciences, Case Western Reserve University, Cleveland, OH, United States

Supplemental Table 1 Mean percentage difference between actual and predicted cases per state.

| State                | Observation Days | Population size | 5 data points |                  |                  | 7 data points |                  |                  | 10 data points |                  |                  |
|----------------------|------------------|-----------------|---------------|------------------|------------------|---------------|------------------|------------------|----------------|------------------|------------------|
|                      |                  |                 | Mean [%]      | ↓ 95% CI of mean | ↑ 95% CI of mean | Mean [%]      | ↓ 95% CI of mean | ↑ 95% CI of mean | Mean [%]       | ↓ 95% CI of mean | ↑ 95% CI of mean |
| Alabama              | 151              | 4,908,621       | 2.88          | 0.92             | 4.84             | 1.09          | 0.37             | 1.8              | -0.36          | -0.78            | 0.06             |
| Alaska               | 152              | 734,002         | 5.09          | 1.11             | 9.06             | 1.46          | 0.51             | 2.41             | -0.41          | -0.78            | -0.03            |
| Arizona              | 198              | 7,378,494       | 1.18          | -0.85            | 3.22             | 0.41          | -0.6             | 1.42             | 0.28           | -0.55            | 1.12             |
| Arkansas             | 153              | 3,038,999       | 3.46          | 0.98             | 5.93             | 1.01          | 0.13             | 1.9              | -0.36          | -0.84            | 0.12             |
| California           | 199              | 39,937,489      | 2.54          | -0.73            | 5.81             | 0.8           | -0.38            | 1.97             | 0.14           | -0.71            | 1                |
| Colorado             | 159              | 5,845,526       | 3.87          | 1.34             | 6.39             | 1.2           | 0.55             | 1.86             | -0.48          | -0.81            | -0.15            |
| Connecticut          | 156              | 3,563,077       | 4.19          | 2.04             | 6.35             | 1.54          | 0.66             | 2.42             | -0.46          | -0.87            | -0.06            |
| Delaware             | 153              | 982,895         | 3.05          | 0.45             | 5.66             | 1.23          | 0.41             | 2.04             | -0.47          | -0.92            | -0.01            |
| District of Columbia | 157              | 720,687         | 4.33          | 0.08             | 8.57             | 0.87          | 0.19             | 1.55             | -0.25          | -0.73            | 0.23             |
| Florida              | 163              | 21,992,985      | 2.87          | 0.66             | 5.08             | 1.3           | 0.29             | 2.31             | -0.23          | -0.73            | 0.27             |
| Georgia              | 162              | 10,736,059      | 4.05          | 0.81             | 7.28             | 1.45          | 0.35             | 2.54             | -0.39          | -1               | 0.23             |
| Hawaii               | 158              | 1,412,687       | 2.06          | -0.56            | 4.67             | 0.49          | -0.67            | 1.65             | 0.19           | -0.86            | 1.24             |
| Idaho                | 151              | 1,826,156       | 4.19          | 0.55             | 7.83             | 1.46          | 0.32             | 2.6              | -0.38          | -1.01            | 0.25             |
| Illinois             | 199              | 12,659,682      | 2.19          | -0.18            | 4.57             | 0.81          | -0.18            | 1.81             | 0.13           | -0.55            | 0.8              |
| Indiana              | 158              | 6,745,354       | 5.07          | 0.59             | 9.54             | 1.21          | 0.19             | 2.23             | -0.17          | -0.53            | 0.19             |
| Iowa                 | 156              | 3,179,849       | 1.52          | -0.01            | 3.05             | 0.51          | -0.14            | 1.17             | -0.05          | -0.52            | 0.43             |
| Kansas               | 157              | 2,910,357       | 10.03         | -3.42            | 23.48            | 1.42          | 0.45             | 2.4              | -0.36          | -0.79            | 0.08             |
| Kentucky             | 158              | 4,499,692       | 2.76          | 0.56             | 4.96             | 0.94          | 0.16             | 1.71             | -0.19          | -0.64            | 0.26             |
| Louisiana            | 155              | 4,645,184       | 5.65          | 1.76             | 9.54             | 1.42          | 0.59             | 2.24             | -0.42          | -0.79            | -0.05            |
| Maine                | 152              | 1,345,790       | 5.53          | 1.18             | 9.89             | 1.37          | 0.48             | 2.25             | -0.34          | -0.64            | -0.04            |
| Maryland             | 159              | 6,083,116       | 2.34          | 0.8              | 3.88             | 1.03          | 0.3              | 1.77             | -0.2           | -0.62            | 0.22             |
| Massachusetts        | 192              | 6,976,597       | 3.98          | -1.5             | 9.46             | 0.82          | -0.71            | 2.35             | 0.28           | -0.74            | 1.3              |
| Michigan             | 154              | 10,045,029      | 8.96          | 0.94             | 16.98            | 1.82          | 0.37             | 3.28             | -0.35          | -1.54            | 0.84             |
| Minnesota            | 158              | 5,700,671       | 3.28          | 0.84             | 5.72             | 1.28          | 0.51             | 2.05             | -0.5           | -0.87            | -0.13            |
| Mississippi          | 153              | 2,989,260       | 3.41          | 1.09             | 5.73             | 1.18          | 0.48             | 1.89             | -0.52          | -0.86            | -0.17            |
| Missouri             | 157              | 6,169,270       | 3.06          | 0.09             | 6.04             | 1.37          | 0.24             | 2.5              | -0.32          | -0.91            | 0.28             |
| Montana              | 151              | 1,086,759       | 1.87          | 0.18             | 3.57             | 0.92          | 0.24             | 1.59             | -0.23          | -0.58            | 0.12             |
| Nebraska             | 176              | 1,952,570       | 0.46          | -0.76            | 1.68             | 0.15          | -0.47            | 0.77             | 0.03           | -0.33            | 0.39             |
| Nevada               | 159              | 3,139,658       | 2.22          | 0.24             | 4.19             | 0.95          | -0.07            | 1.97             | -0.39          | -0.88            | 0.09             |
| New Hampshire        | 162              | 1,371,246       | 2.11          | -0.05            | 4.27             | 0.86          | -0.04            | 1.75             | 0              | -0.64            | 0.64             |
| New Jersey           | 160              | 8,936,574       | 2.95          | 1.4              | 4.5              | 1.19          | 0.44             | 1.93             | -0.43          | -0.83            | -0.02            |
| New Mexico           | 153              | 2,096,640       | 2.09          | 0.83             | 3.36             | 0.73          | 0.28             | 1.18             | -0.21          | -0.47            | 0.05             |



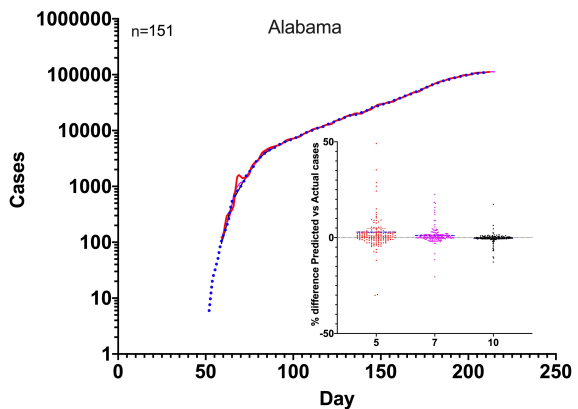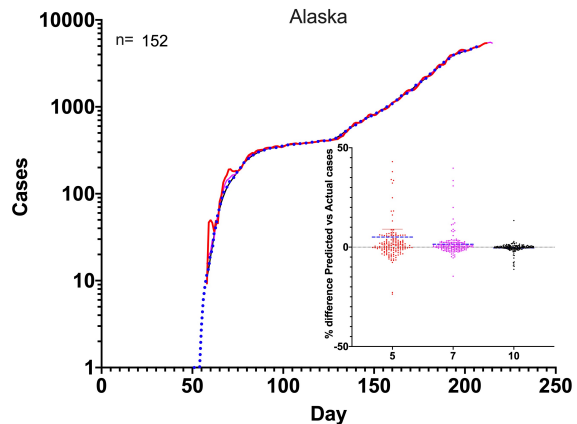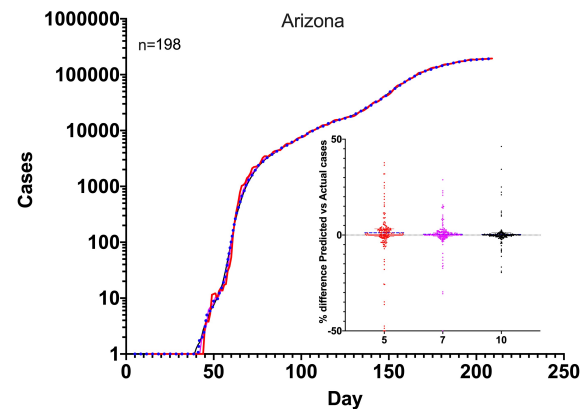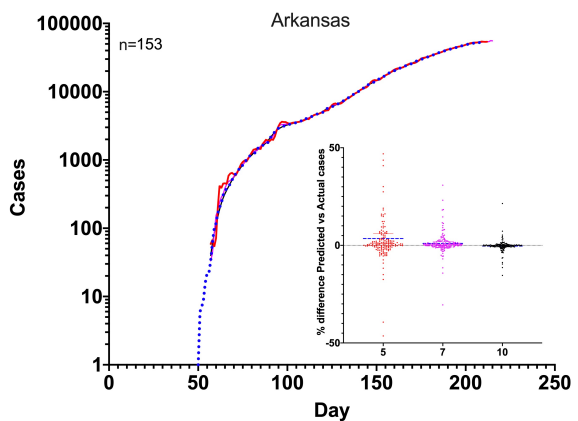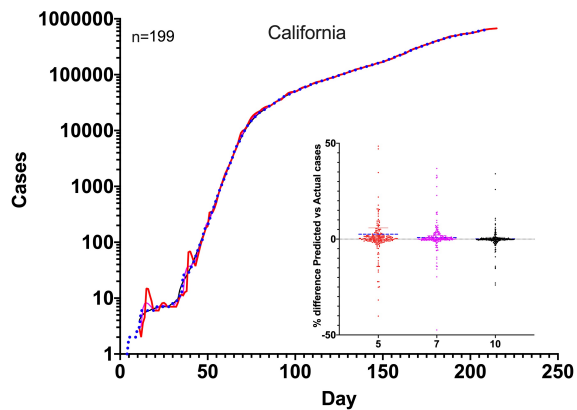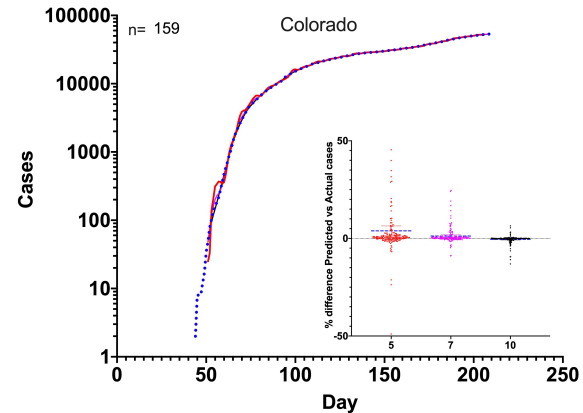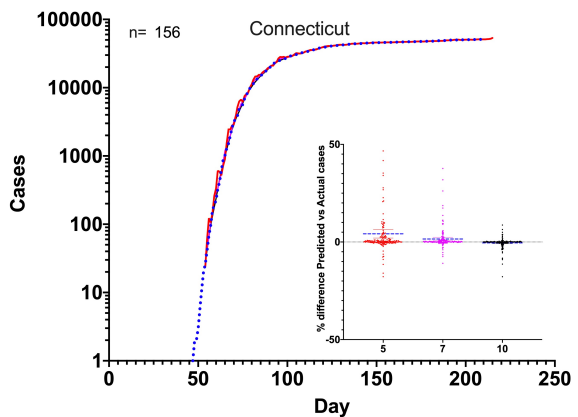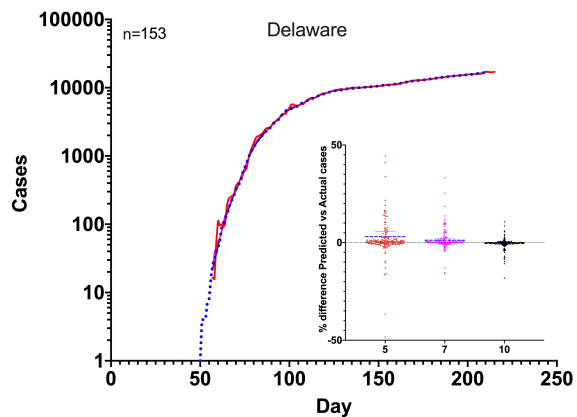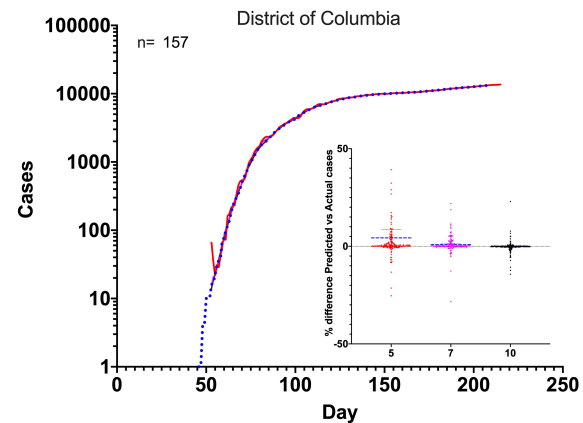

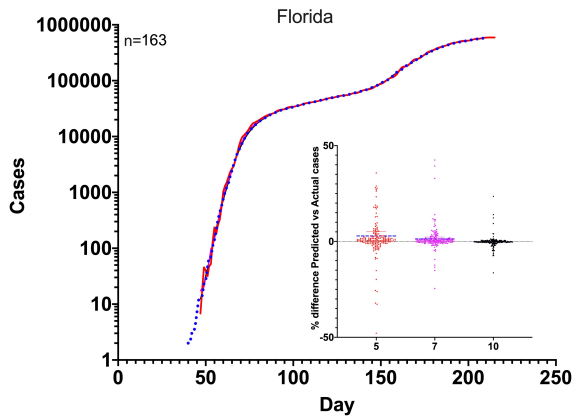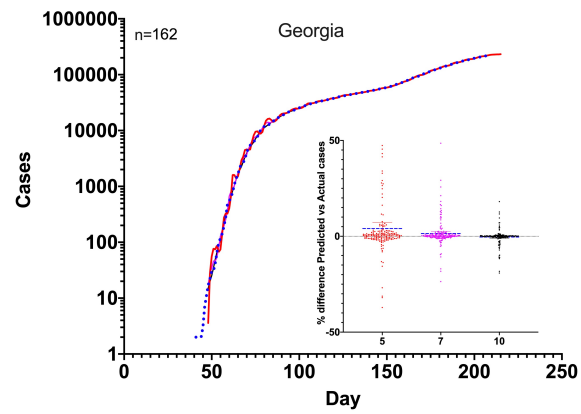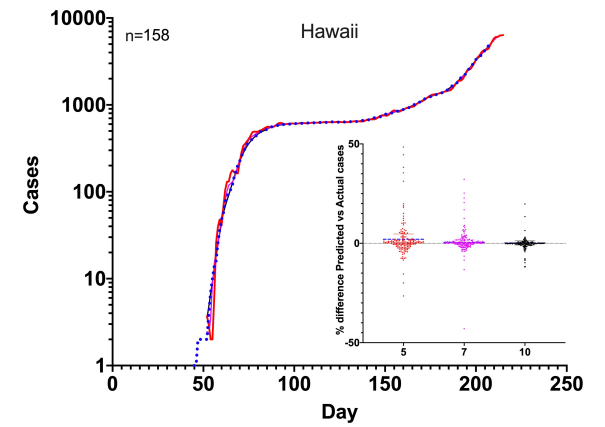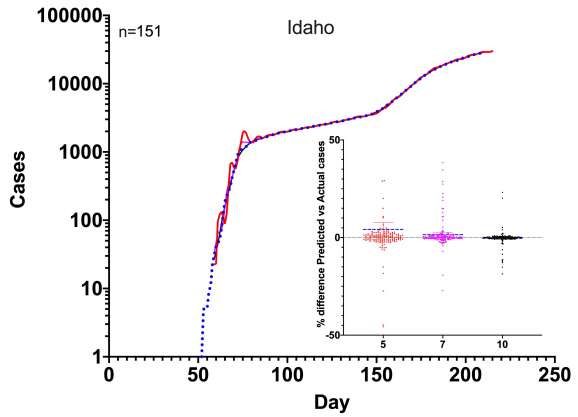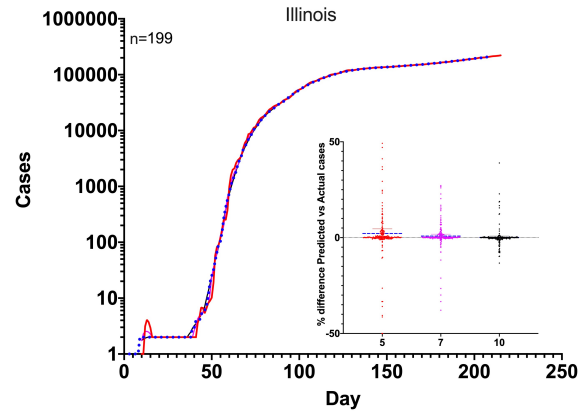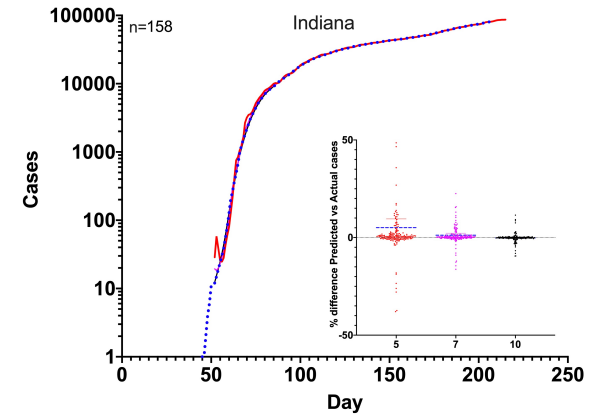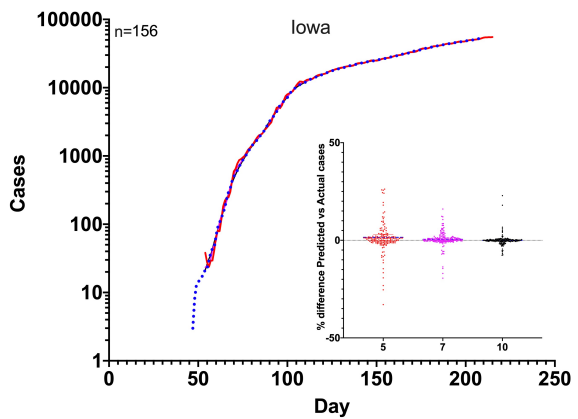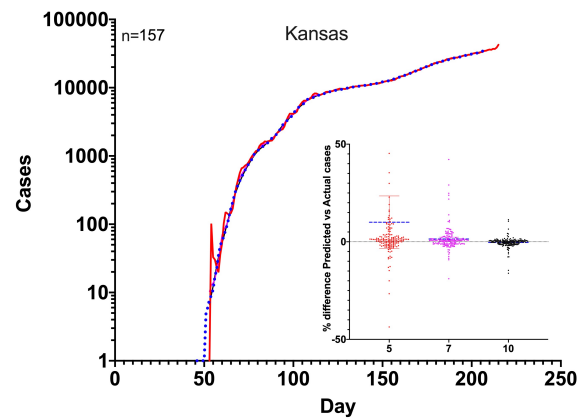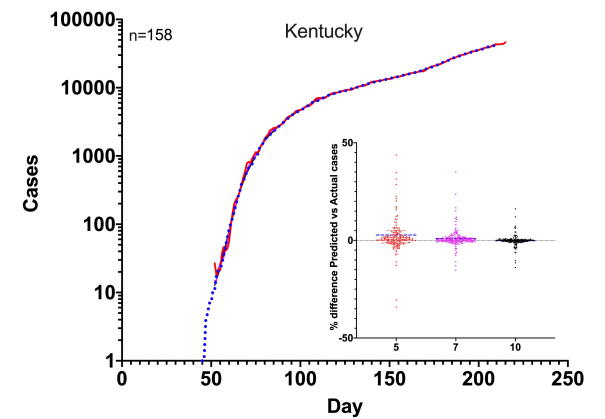

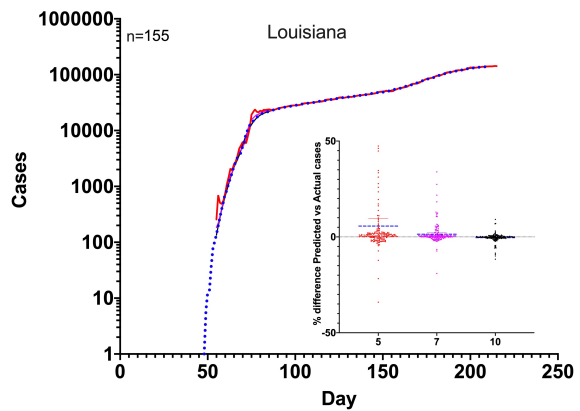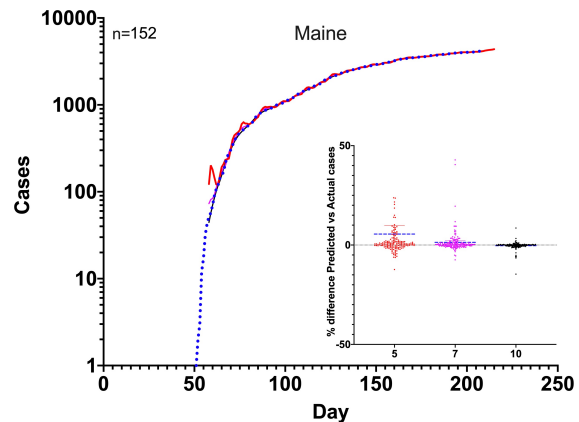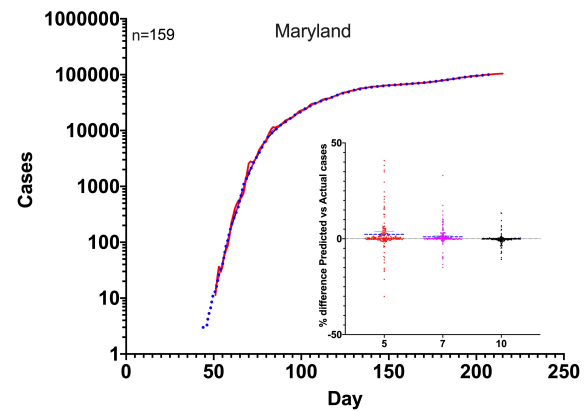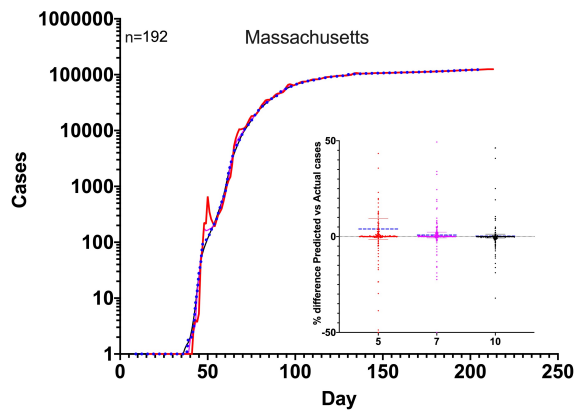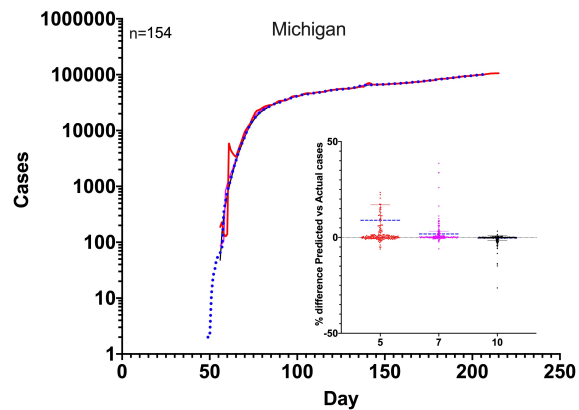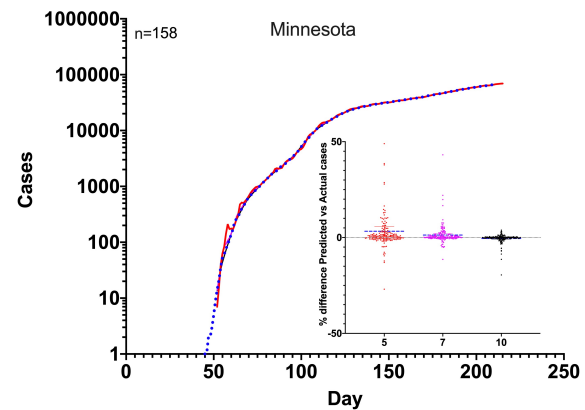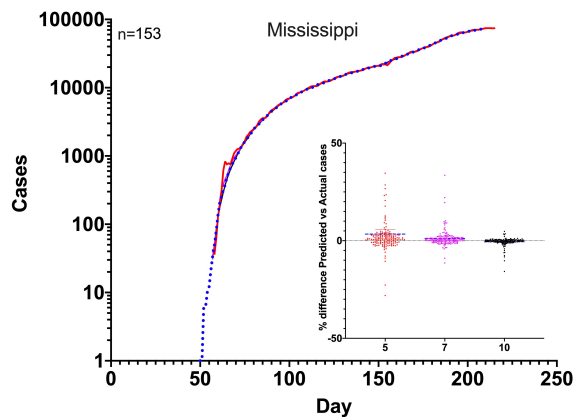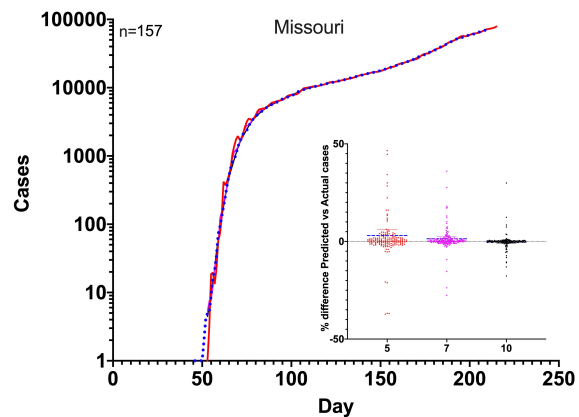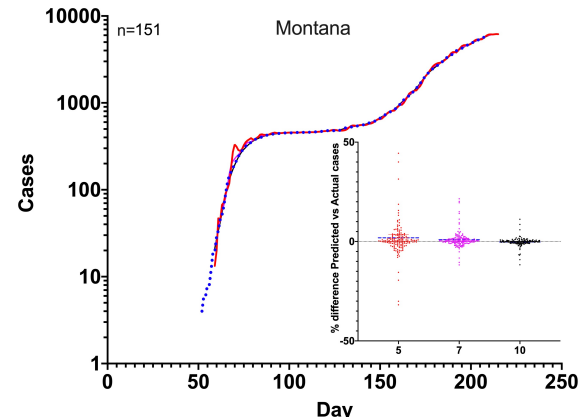

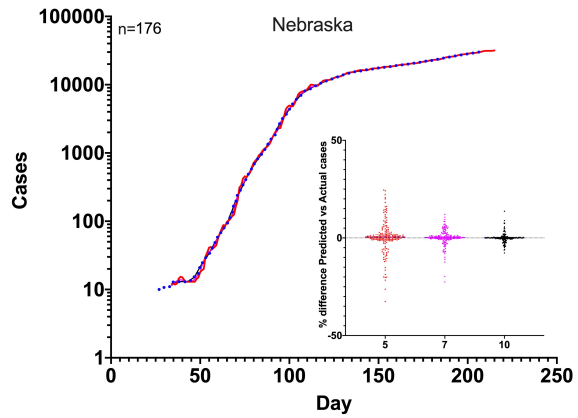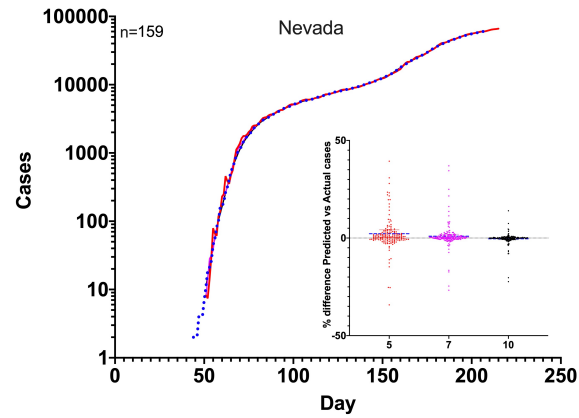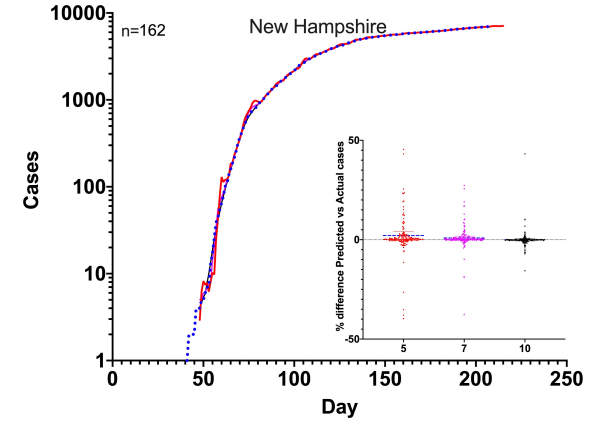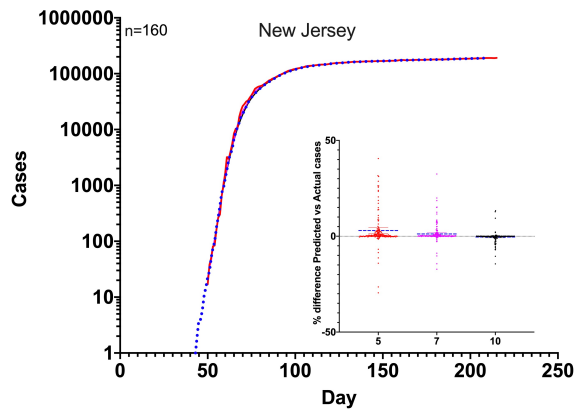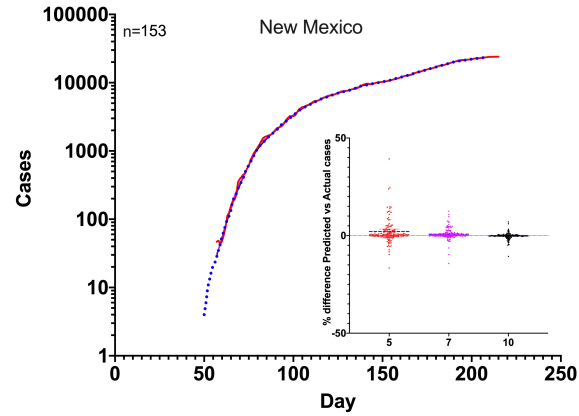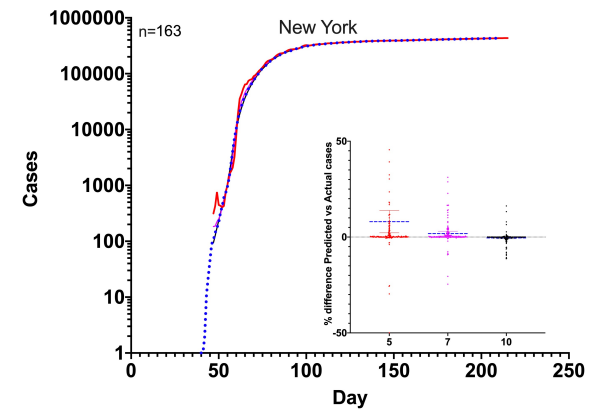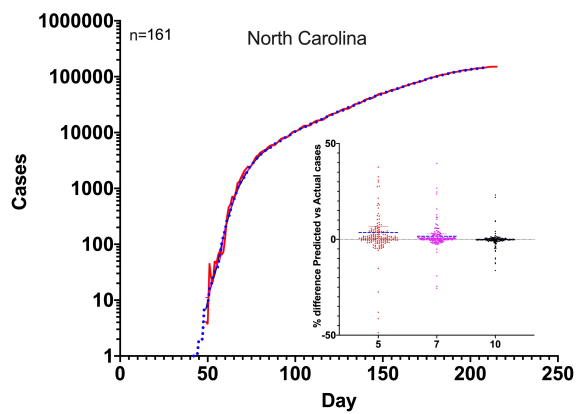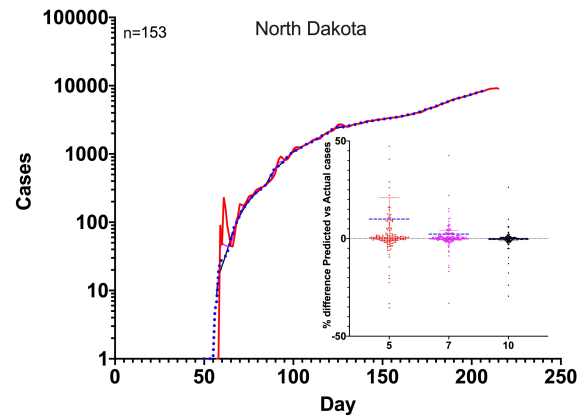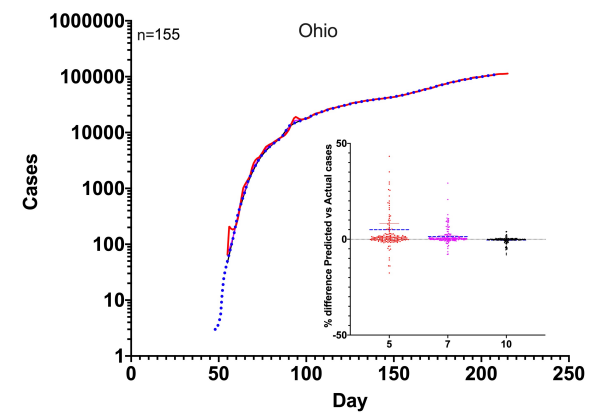

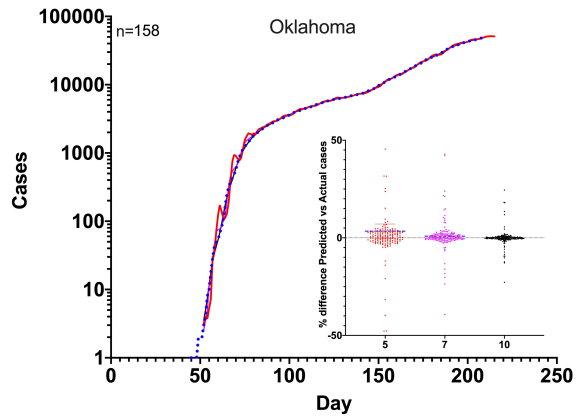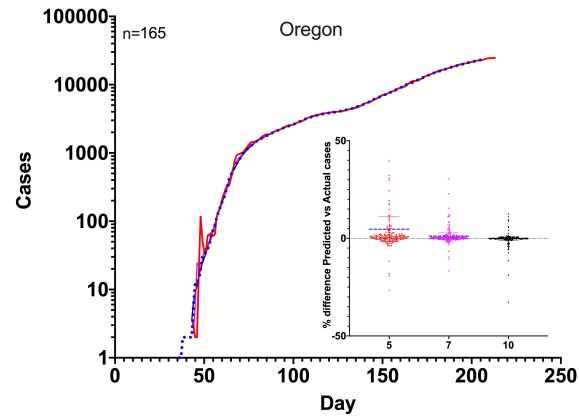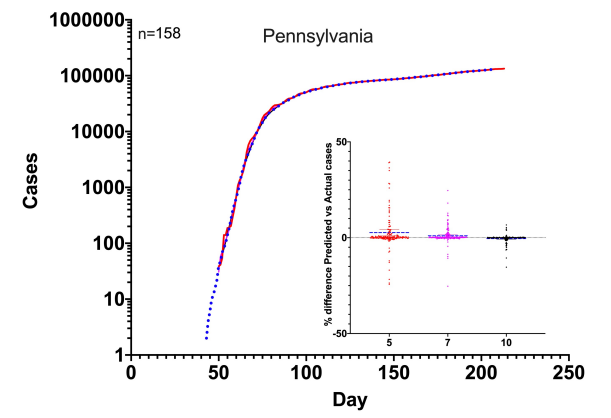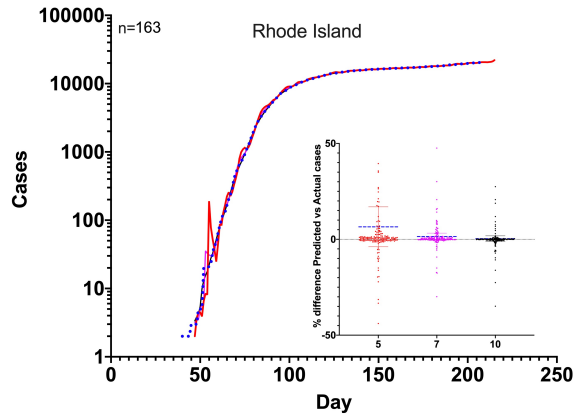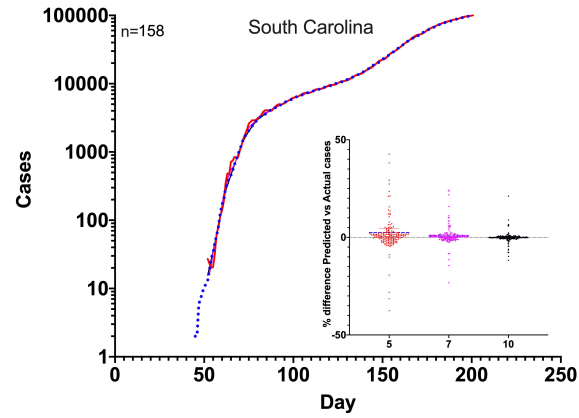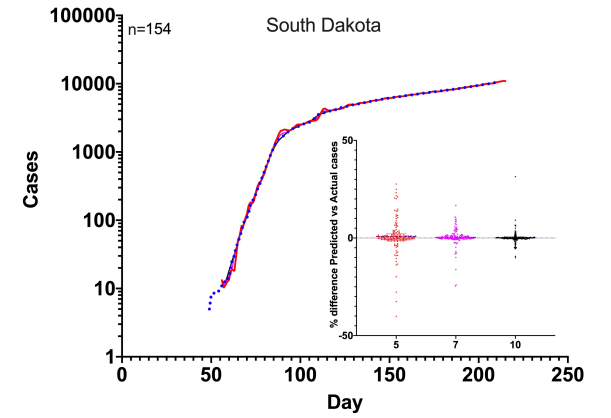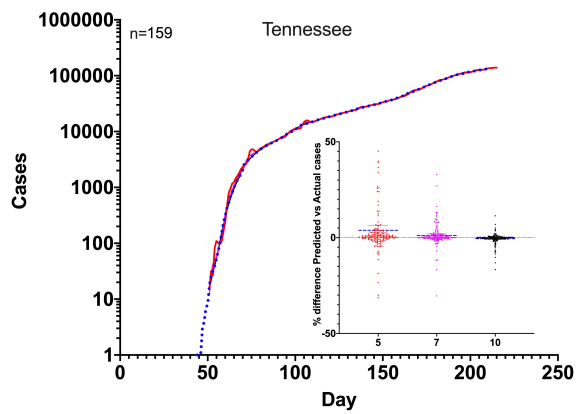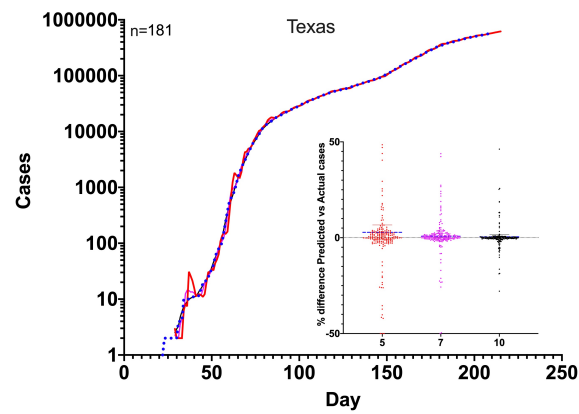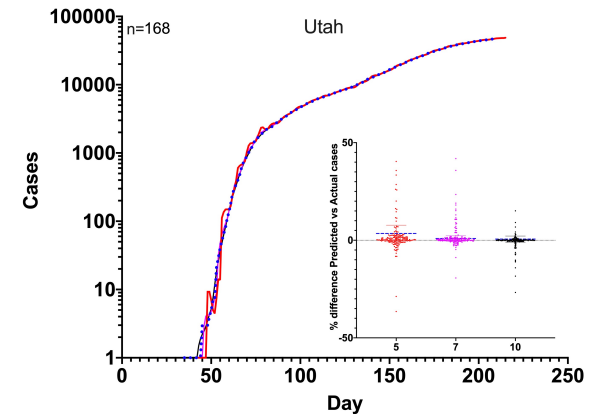



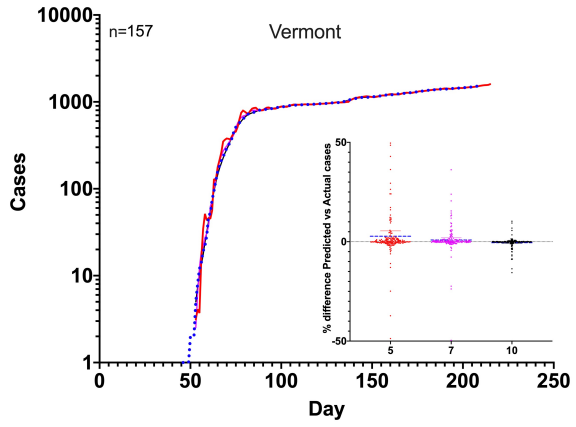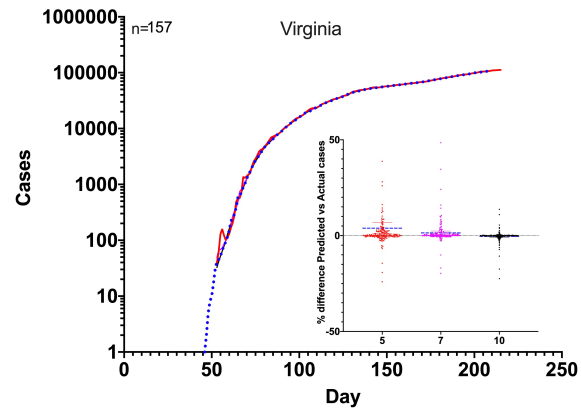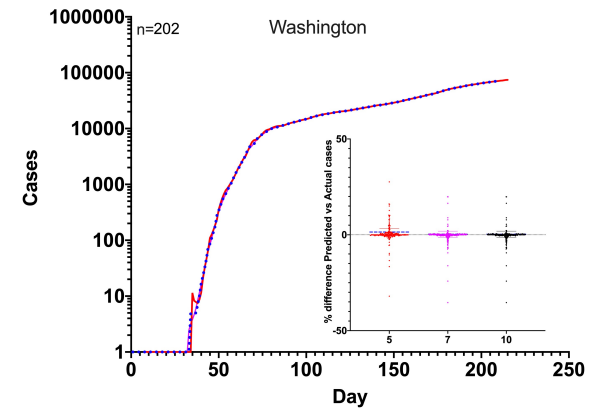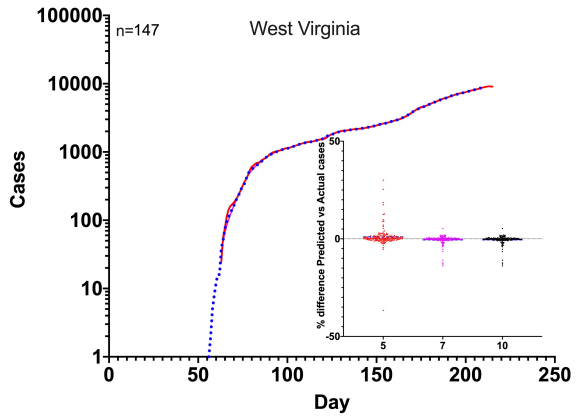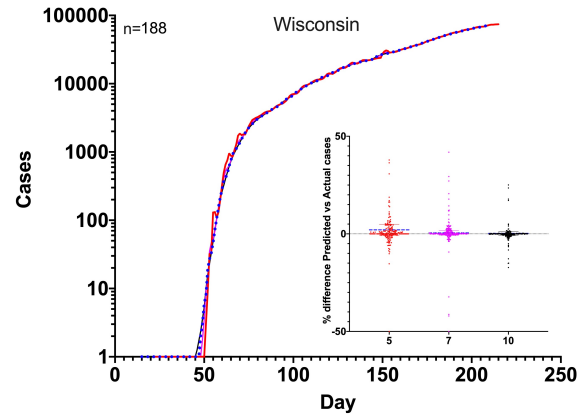

Supplement: Supplementary file [file 2020.09.09.20191593-2.pdf]
